1 **Experimental evaluation of environmental DNA detection of a rare fish in turbid**  
2 **water**

3

4 Running title: eDNA experiments in turbid water

5

6 Ann E. Holmes<sup>1,2\*</sup>, Melinda R. Baerwald<sup>3</sup>, Jeff Rodzen<sup>4</sup>, Brian M. Schreier<sup>3</sup>, Brian  
7 Mahardja<sup>5</sup>, and Amanda J. Finger<sup>2</sup>

8

9 <sup>1</sup>Graduate Group in Ecology, University of California, Davis, 1 Shields Avenue, Davis,  
10 CA, 95616 USA

11 <sup>2</sup>Genomic Variation Laboratory, Department of Animal Science, University of California,  
12 Davis, 1 Shields Avenue, Davis, CA, 95616 USA

13 <sup>3</sup>California Department of Water Resources, Sacramento, CA 95814 USA

14 <sup>4</sup>California Department of Fish and Wildlife, Genetics Research Laboratory, 1415 North  
15 Market Boulevard, Sacramento, CA, 95834 USA

16 <sup>5</sup>US Department of the Interior, Bureau of Reclamation, Sacramento, CA 95814 USA

17 **\*Corresponding author**

18 Ann Holmes, aholmes@ucdavis.edu

19 Genomic Variation Laboratory, Department of Animal Science, University of California,  
20 Davis, 1 Shields Avenue, Davis, CA, 95616 USA. +1 530-752-6351

21

22 **Keywords:** conservation; delta smelt; endangered species; estuary; environmental  
23 DNA; particulate matter; real-time polymerase chain reaction; turbidity

24

25 **Abstract**

26 Environmental DNA (eDNA) approaches enable sensitive detection of rare aquatic  
27 species. However, water conditions like turbidity can limit sensitivity, resulting in false  
28 negative detections. The dynamics of eDNA detection in turbid conditions are poorly  
29 understood, but can be better characterized through experimental work. In this study, 1-  
30 L field-collected water samples were spiked with tank-sourced eDNA from a rare,  
31 endangered estuarine fish at concentrations similar to eDNA samples collected from the  
32 natural environment. Samples using non-turbid water (5 NTU), turbid water (50 NTU),  
33 and prefiltered turbid water were filtered using four filter types (pore size range 0.45  $\mu\text{m}$ -  
34 10  $\mu\text{m}$ ). Detection success using a species-specific Taqman qPCR assay was assessed  
35 as both eDNA copy number and detection/non-detection. Glass fiber filters (nominal  
36 pore size 1.6  $\mu\text{m}$ ) yielded the highest number of eDNA copies and detections in non-  
37 turbid water and the highest detection rate in turbid water when used without a prefilter.  
38 Detection was a more robust metric for evaluating species presence across turbidity  
39 conditions compared with eDNA copy number. Prefiltration improved detection rates for  
40 the other filters tested (polycarbonate and cartridge filters). Filter material and design  
41 appear to interact differently with the prefiltration step, and may be more important  
42 considerations than pore size for eDNA capture in turbid water. Interactions between  
43 eDNA particles, suspended particulate matter, and filters are important to consider for  
44 eDNA methods optimization and interpretation of rare species detections in turbid  
45 water.

46

## 47 **Introduction**

48           Environmental DNA (eDNA) can be an efficient tool for surveying species; it can  
49 be as or more sensitive than conventional survey methods (Jerde et al. 2011; Shaw et  
50 al. 2016; Sigsgaard et al. 2017) and detect species not detected using other methods  
51 (e.g., Budd et al. 2021; Renan et al. 2017). Indirect detection using eDNA poses little or  
52 no risk of sampling-related mortality or stress to both target and non-target organisms,  
53 an advantage when targeting or sampling in the vicinity of endangered or sensitive  
54 species. Moreover, eDNA samples can usually be collected with less risk to personnel  
55 in potentially hazardous conditions (e.g., high gradient streams and rivers). However,  
56 despite the advantages of using eDNA to survey rare species, challenging  
57 environmental conditions may adversely affect detection sensitivity, resulting in false  
58 negative detections.

59           The sensitivity of eDNA detection is influenced by interacting suites of biological  
60 and environmental conditions (Barnes and Turner 2016). Target organism biomass,  
61 individual body size, and eDNA shed rate may influence eDNA detection probability  
62 (e.g., Sassoubre et al. 2016). Environmental conditions such as water movement,  
63 turbidity, temperature, pH, salinity, solar radiation, or microbial community composition  
64 (or the related biotic conditions) also affect species detection (e.g., Collins et al. 2018;  
65 Jane et al. 2015; Laramie et al. 2015; Seymour et al. 2018; Shogren et al. 2018;  
66 Strickler et al. 2015; Tsuji et al. 2019). Turbidity is a previously recognized challenge for  
67 eDNA sampling and a suspected cause of reduced sensitivity and false negative  
68 detections (Egeter et al. 2018; Williams et al. 2017).

69 Turbidity can affect eDNA detection in a variety of ways. Turbidity is a measure  
70 of light scatter in water and is associated with reduced water clarity, although they are  
71 not necessarily equivalent measurements. Turbidity is caused by a variety of unrelated  
72 phenomena including particulates spanning a range of sizes and compositions (e.g.,  
73 sediment, inorganic material, or organic material such as plankton and plant detritus)  
74 and decreased water clarity without particulates (e.g., staining by tannins from plant  
75 material). Both particulates and staining can introduce PCR inhibitors (e.g., humic  
76 compounds; Matheson et al. 2010) that interfere with molecular detection. The effects of  
77 PCR inhibitors can be effectively removed without diluting samples using appropriate  
78 extraction methods (Hunter et al. 2015) or with a post-extraction inhibitor removal step  
79 (Williams et al. 2017).

80 Suspended particulate matter remains a major challenge for eDNA detection.  
81 Particulates clog filters, leading to decreased filtration volumes and long filtration times.  
82 Particulate matter can decrease sensitivity or eliminate eDNA detections altogether  
83 even when the target species is present (Day et al. 2019). Species detection sensitivity  
84 has been positively correlated with volume of water sampled (Hunter et al. 2019;  
85 Schabacker et al. 2020; Sepulveda et al. 2019). Sample volume has been shown to  
86 influence eDNA detection sensitivity more than the number of samples or quantitative  
87 PCR (qPCR) replicates (Schultz and Lance 2015). However, long filtration times may  
88 not be worth the wait; measurements of membrane pressure suggest diminishing  
89 returns on eDNA detection due to increased pressure during filtration (Thomas et al.  
90 2018). Filters with larger pores (Robson et al. 2016) and prefiltration (Takahara et al.  
91 2012) are recommended to increase water volume and decrease filtering time in turbid

92 systems. While some results suggest a positive effect of prefiltration on eDNA capture  
93 (Takahara et al. 2012), presumably due to increased volume filtered, others are  
94 inconclusive (Majaneva et al. 2018). A better understanding of the impact of turbidity  
95 and methodological adjustments on eDNA detection is necessary, particularly when a  
96 rare species of interest is positively associated with turbidity (e.g., Feyrer et al. 2007;  
97 Nobriga 2002; Sommer et al. 2011).

98 In this study, we examine the effects of turbidity and filtration methods for  
99 detection of target eDNA in low concentrations. We tested four filter types (pore size  
100 range 0.45  $\mu\text{m}$ -10  $\mu\text{m}$ ) and the addition of a prefiltration step for turbid water. Filters  
101 were chosen to capture fish mitochondrial eDNA particles in the size range where they  
102 are most abundant (1-10  $\mu\text{m}$ ; Turner et al. 2014; Wilcox et al. 2015). We hypothesized  
103 that (1) turbidity would decrease both eDNA copies detected and the detection rate, (2)  
104 larger filter pore sizes would partially offset the negative effects of suspended  
105 particulate matter on eDNA detection, and (3) prefiltration would improve detection in  
106 turbid water.

107

## 108 **Materials & Methods**

### 109 *Study species and habitat*

110 Delta smelt (*Hypomesus transpacificus*) are small (5-7 cm), critically endangered  
111 fish endemic to the San Francisco Estuary (SFE), California, USA. Delta smelt are  
112 considered the sentinel species of the SFE ecosystem (Moyle et al. 2018), significant in  
113 indigenous Miwko? (Miwok) traditional cultural practice and law (Hankins 2018), and at  
114 risk of extinction in the near future (Moyle et al. 2018). Delta smelt typically have an

115 annual life cycle and are unusually sensitive to changes in estuarine conditions (Moyle  
116 et al. 1992). The species is protected under both the Federal Endangered Species Act  
117 (ESA) and California Endangered Species Act (CESA) due to a 90% decline in  
118 population abundance over the two decades prior to listing in 1993 (USFWS 1993).  
119 Around 2000, abundance of delta smelt and other pelagic fishes in the SFE again  
120 declined dramatically, most likely due to environmental factors including changes in  
121 water quality, habitat degradation, and effects of introduced species (Sommer et al.  
122 2007; Moyle et al. 2016).

123         The presence of delta smelt is positively associated with turbid water (Feyrer et  
124 al. 2007; Nobriga et al. 2008; Sommer et al. 2011) perhaps due to decreased predation  
125 risk (Ferrari et al 2014; Bennett and Burau 2015) and increased larval feeding rates  
126 (Baskerville-Bridges et al. 2004; Tigan et al. 2020). The physiological performance of  
127 delta smelt is negatively affected by turbidity levels below 25 NTU and above 80 NTU  
128 (Hasenbein et al. 2016). Turbidity in delta smelt habitat is attributed to suspended  
129 sediment transported from upstream sources or resuspended in the water column due  
130 to wind or turbulence (Schoellhamer 2002).

131         Delta smelt are difficult to survey due to extremely low abundance, despite  
132 exceptional monitoring efforts by state and federal agencies. The U.S. Fish and Wildlife  
133 Service (USFWS) began year-round, spatially extensive surveys targeting delta smelt  
134 using multiple (conventional) gear types in late 2016 (Enhanced Delta Smelt Monitoring  
135 program (EDSM; USFWS 2022). The EDSM provides data on distribution and  
136 abundance of delta smelt and other species of concern for conservation and  
137 management (Mahardja et al. 2021). Pilot eDNA surveys of delta smelt conducted

138 alongside EDSM trawls and indicated concordance with trawl sampling, but single  
139 positive qPCR replicates for each sample provide weak evidence of species presence  
140 (Supplementary File S1; Goldberg et al. 2016). Moreover, already low trawl detection  
141 rates continued to decrease (USFWS 2022), making further field testing of eDNA  
142 methods unfeasible. Experimental testing was undertaken to determine if turbidity and  
143 filtration methods were major constraints on eDNA detection of delta smelt.

144

#### 145 *In vivo testing*

146 Quantitative PCR (qPCR) detection of delta smelt eDNA used a Taqman probe  
147 and primers previously validated using genomic DNA and tested for cross-reactivity with  
148 congener Wakasagi smelt (*Hypomesus nipponensis*) and 21 other SFE fish species  
149 (Baerwald et al. 2011). In this study, the Limit of Detection (LOD) and Limit of  
150 Quantification (LOQ) were determined following guidelines for standardized analysis of  
151 eDNA samples (Klymus et al. 2019; Merkes et al. 2019) using serial dilutions of a  
152 synthetic oligonucleotide gBlocks Gene Fragment (Integrated DNA Technologies, San  
153 Diego, CA) of a portion of the delta smelt cytochrome b gene assayed in 8 replicates  
154 with a starting concentration of 0.1 pg/ul ( $3.5 \times 10^6$  copies/reaction) and 1:4 subsequent  
155 dilution.

156 LOD is defined as the lowest concentration in which the target molecule can be  
157 detected in 95% of replicates (Bustin et al. 2009). The theoretical minimum LOD is 3  
158 copies of template DNA per PCR reaction, assuming a Poisson distribution of the target  
159 molecules in PCR reactions. The effective LOD is applied to multiple qPCR replicates,  
160 showing a decrease in LOD with increasing replicates (Klymus et al. 2019). The LOQ

161 assesses precision using the coefficient of variation (CV) of the measured  
162 concentrations of DNA standards (Kubista 2014). The LOQ is defined as the lowest  
163 concentration at which the CV of qPCR results is less than 35% (Klymus et al. 2019).

164

#### 165 *Filtration experiment*

166 Filtration used a peristaltic pump (Geotech Environmental Equipment Inc.,  
167 Denver, Colorado). Bottles and other materials used for filtering were sterilized for at  
168 least 20 min in 20% bleach then rinsed three times with clean water. Tubing was  
169 sterilized by pumping 20% bleach through the tube for at least 60 sec then flushing the  
170 tube with clean water for at least 60 sec. The samples were set up and filtered in a  
171 laboratory space free from delta smelt tanks, tissue, or DNA.

172 Estuarine water was collected in sterilized 5-gal buckets from two sites in a  
173 freshwater region of the upper SFE where delta smelt are not present (Figure 1).  
174 Turbidity of the water collected at the sites was measured at ~5 NTU (“non-turbid”) and  
175 ~50 NTU (“turbid”) with a Hach 2100Q portable turbidimeter. The non-turbid and turbid  
176 designations are relative measures and ecologically relevant to delta smelt; 50 NTU is  
177 less turbid than conditions regularly observed in winter in the SFE (>100 NTU). The  
178 buckets were covered and transported to UC Davis campus. Water was homogenized  
179 by stirring with a sterilized implement before being transferred to sterilized 1 L bottles for  
180 the experiment.

181 A schematic of the study design is shown in Figure 2. Water from a 340-L tank  
182 (recirculating aquaculture system with daily make-up water to maintain a tank volume)  
183 containing an estimated 186 adult delta smelt at the UC Davis Center for Aquatic



184 Biology and Aquaculture was collected in a sterile 1-L bottle and stored on wet ice. The  
185 bottle was gently inverted several times to homogenize eDNA prior to pipetting 0.5 mL  
186 tank water into each 1 L bottle of estuarine water. Pilot experiments determined that 0.5  
187 mL tank water added to 1 L of estuary water produced Ct values similar to field  
188 detections. The same process was repeated but 1 mL was added to each bottle in case  
189 0.5 mL tank water was undetectable in some replicates. Adding two small but different  
190 volumes of tank water also allowed us to assess whether small differences in eDNA  
191 concentration can be distinguished at low concentrations. Bottles were placed in a  
192 sterilized cooler with wet ice and filtered within ~8 hours.

193 Each bottle was gently inverted several times prior to filtering. Three biological  
194 replicates were filtered using each of the four filter types in the three treatments: non-  
195 turbid water, turbid water, and turbid water with the addition of a prefilter (Table 1). This  
196 design resulted in 72 biological replicates (1-L bottles). Glass fiber, polycarbonate filters,  
197 and nylon mesh prefilters were loaded into sterile filter holders (Swinnex-47,  
198 MilliporeSigma) attached to silicon tubing. Sterivex filter cartridges were attached  
199 directly to the tubing. Water was pumped through filters until the 1-L samples was  
200 filtered or flow ceased (usually a maximum of ~15 min). Filtration volumes less than 1 L  
201 reflect filter clogging in turbid water. After filtration, glass fiber and polycarbonate filters  
202 were folded twice and placed in a sterile 2 mL tube and Sterivex filters were capped at  
203 each end. The tubes or capped cartridges were placed in individual sterile plastic bags  
204 and immediately frozen on dry ice. Frozen samples were transferred to -20°C for  
205 storage until extraction. Three negative control samples of estuarine water from each  
206 turbidity value without added tank water were processed with the field samples.

207 Genetics work was conducted in a dedicated eDNA laboratory space following  
208 recommended guidelines (Goldberg et al. 2016). DNA was extracted in a dedicated  
209 eDNA extraction hood using the DNeasy PowerWater Kit (Qiagen, Hilden, Germany),  
210 which has been shown to effectively remove PCR inhibitors (Eichmiller et al. 2015).  
211 DNA from whole 47 mm filters was extracted using the DNeasy PowerWater Kit and  
212 from Sterivex cartridges were extracted using the DNeasy PowerWater Sterivex Kit.  
213 Extraction protocols followed the manufacturer's instructions including the optional heat  
214 lysis step (Supplementary File S2). Elution buffer incubation time was extended to ~20  
215 minutes and DNA was eluted into LoBind tubes (Eppendorf, Hamburg, Germany).

216 Six technical replicates (PCR reactions) of each sample and the estuary water  
217 negative controls were assayed using a species-specific Taqman assay targeting delta  
218 smelt (Baerwald et al. 2011). qPCR reactions set-up in a dedicated eDNA PCR hood  
219 used TaqMan Environmental Master Mix 2.0 (Applied Biosystems, Waltham, MA, USA).  
220 Reagent volumes and cycling conditions are listed in Table 2. qPCR was conducted on  
221 a single CFX Touch Real-Time PCR instrument (Bio-Rad Laboratories, Hercules, CA,  
222 USA) in a laboratory room separate from eDNA extraction and PCR setup hoods. No-  
223 template qPCR controls and gBlock qPCR positive control samples were also assayed  
224 using the same protocol.

225

### 226 *Statistical modeling*

227 Results were analyzed using generalized linear mixed-effect models (GLMMs)  
228 and a model comparison approach. Analysis was conducted in R (R Core Team, 2017)  
229 using packages lme4 (Bates et al. 2015) and bbmle (Bolker and R Development Core

230 Team, 2017). The models used results in non-turbid water, turbid water without a  
231 prefilter, and turbid water with a prefilter (n=144 qPCR reactions for each treatment) to  
232 identify factors that influence success of delta smelt detection under conditions similar  
233 to those observed in the natural environment (turbidity and low eDNA concentrations).

234       Either eDNA copy number or detection/non-detection can be used to evaluate  
235 the factors that influence detection. Copy number allows for a more nuanced  
236 interpretation of detection success, but may not be reliable for low eDNA concentrations  
237 (i.e., below the LOQ). We modeled both eDNA copies detected (as  $\log(\text{copies}+1)$ ) and  
238 detection/non-detection in each qPCR replicate as response variables in two models.  
239 The full model for both analyses included five covariates as fixed effects: “turbidity” (a  
240 categorical variable with two levels corresponding to 5 NTU or 50 NTU); “filter type” (a  
241 categorical variable with four levels corresponding to the four filter types); “prefilter” (a  
242 categorical variable with two levels), “volume filtered” (a continuous variable of the  
243 volume of water filtered rounded to the nearest 50 mL), and “volume of tank water  
244 added” (a categorical variable with two levels corresponding to addition of 0.5 or 1 mL of  
245 water from the tank of delta smelt). Interactions between both turbidity and prefilter with  
246 filter type were also considered. Full models included biological replicate (each 1-L  
247 bottle filtered) as a random effect to account for bottle-to-bottle (biological replicate)  
248 variation within treatments. Models were compared using Akaike's Information Criterion  
249 corrected for small sample size (AICc).

250

## 251 **Results**

252 *In vivo testing*

253           The one replicate Limit of Detection (LOD) was 2.47 copies per PCR reaction  
254 (SE 1.59) and the Limit of Quantification (LOQ) was 67 copies per PCR reaction (Figure  
255 2; Supplementary Files S3, S4). Although less than the theoretical minimum of 3 copies  
256 per reaction, the calculated LOD calculation is acceptable because it falls within the  
257 calculated error (Bustin et al. 2009). The effective LOD for six qPCR replicates (the  
258 number used in this study) was 1.02 copy per PCR reaction (SE 0.15; Supplementary  
259 File S4).

260

#### 261 *Filtration experiment*

262           In non-turbid water, eDNA detection was 100% for glass fiber, cartridge, and 5-  
263  $\mu\text{m}$  pore polycarbonate filters, and close to 100% for 5- $\mu\text{m}$  pore polycarbonate filters  
264 (Figure 4; Table 3; Supplemental File S5). eDNA copies were highest for glass fiber  
265 filters and cartridge filters, despite the lower volume filtered by cartridge filters due to  
266 clogging (Figure 5; Table 3; Supplemental File S5). In turbid water, eDNA detection was  
267 nearly 100% for glass fiber filters, but below ~75% for Sterivex filters and at or below  
268 50% for both polycarbonate filters (Figure 4; Table 3; Supplemental File S5). Turbidity  
269 reduced the number of eDNA copies detected for all samples, especially the Sterivex  
270 and polycarbonate filters (Figure 5; Table 3; Supplemental File S5). The addition of a  
271 prefilter increased copy numbers and detection rate for all samples except those  
272 collected on glass fiber filters, which were negatively impacted by prefiltration (Figure 4,  
273 5; Table 3; Supplemental File S5). Delta smelt eDNA was not detected in negative  
274 controls of estuarine water or qPCR no template controls.

275

276 *Statistical modeling*

277           Model comparison did not support retaining a random effect term for individual  
278 bottles (Supplemental File S6). The highest weighted models tested for both response  
279 variables retained fixed effects filter type and prefilter, and an interaction between the  
280 filter type and prefilter (Table 4; Supplemental File S6). For eDNA copies as the  
281 response variable, the full model and a model where only filtration volume was missing.  
282 For detection/non-detection as a response variable, turbidity and tank water added were  
283 each missing from one of the top two models.

284

285 **Discussion**

286           In this study, we set out to untangle some of the challenges of eDNA detection of  
287 a very rare target organism in turbid conditions. First, we adapted a protocol for  
288 detection of delta smelt eDNA based on an assay developed for detection of delta smelt  
289 tissue in predator guts (Baerwald et al. 2011). The calculated Limit of Detection (LOD)  
290 and Limit of Quantification (LOQ) indicate this part of the protocol is optimized for use  
291 eDNA detection of delta smelt. These limits can help guide interpretation of eDNA  
292 results (Figure 5).

293           We found that (1) turbidity decreased detection, (2) pore size appear less  
294 important than filter type for increasing detection in turbid water, and (3) prefiltration has  
295 mixed results. In non-turbid water, all filters except 10  $\mu\text{m}$  polycarbonate filters had  
296 100% detection and eDNA copies at or above the LOQ. This result is consistent with the  
297 presumed size of eDNA particles (1-10  $\mu\text{m}$ ; Turner et al., 2014). Filters with smaller  
298 pores ( $\leq 1 \mu\text{m}$ ) recommended to optimize eDNA capture can lead to reduced sample

299 volumes and longer filtration times (Li et al. 2018). We did not see a clear pattern of  
300 larger pore sizes (as listed in filter description; Table 1) performing better in turbid water;  
301 filter material and construction may be more important characteristics. Despite low  
302 sample volumes, Sterivex cartridge filters used with a prefilter provided the most  
303 consistent results in terms of eDNA copy number. Cartridge filters are easier to protect  
304 from contamination in the field, however they are more expensive than the circular filters  
305 and extraction is time-consuming. Experiments indicated both a reduction in eDNA  
306 copies and detections in turbid water that could be partially mitigated with a prefilter for  
307 some filter types; prefilters did not appear to perform well when used with glass fiber  
308 filters. Filter type and prefilter status appeared to be the most important influences on  
309 detection. Glass fiber filters used without a prefilter provide appear to provide more  
310 efficient and economical detection of eDNA.

311

### 312 *Interpretation of low concentration eDNA*

313 LOD and LOQ help establish standard practices for reporting eDNA detections,  
314 especially for detection of low-concentration eDNA (Klymus et al. 2019). The LOD of the  
315 Taqman assay used for delta smelt eDNA detection (Baerwald et al. 2011) was at the  
316 theoretical lowest limit of 3 copies per reaction, indicating that qPCR detection was well-  
317 optimized. eDNA copy numbers were generally below the LOQ (i.e., unreliable for  
318 quantification). In turbid water, there was not a clear distinction in detection between  
319 samples with 0.5mL and 1L of tank water added in turbid water (Figure 5). Copy number  
320 is likely an unreliable metric for using eDNA to model abundance or biomass of a rare  
321 fish in turbid water; presence/absence is a more straightforward signal to interpret when

322 samples vary turbidity. These results also suggest that large turbidity differences  
323 between samples can prevent an apples-to-apples comparison of eDNA sample  
324 concentration for the same target species.

325 For rare species, even detection/non-detection can be challenging to interpret:  
326 when is a weak signal considered a positive detection? High Cq values (>40) are often  
327 treated as unreliable and therefore interpreted as potential false positive detections.  
328 However, the common practice of setting non-detect values to 40 may introduce bias  
329 (McCall et al. 2014) and increase the false negative detection rate. As in many areas of  
330 science, it is impossible to “prove the negative.” In this study, 3 of 432 qPCR reactions  
331 (less than 1%) assaying samples with the addition of delta smelt tank water generated  
332 Cq values >40 (Table S4). The results of our analysis of these samples known to  
333 contain target eDNA suggest that, although rare, Cq values >40 can represent true  
334 detections. There was no evidence of contamination in negative control samples. In  
335 addition, although the protocol ran 50 cycles, there were no detections above Cq of 42.  
336 Similarly, an evaluation of eDNA metabarcoding laboratory protocols shows that, above  
337 a certain threshold, additional PCR cycles do not improve species detection (Stoeckle et  
338 al. 2022). Given the current limits of technology, interpretation of weak signals is a  
339 balancing act between signal and noise and likely specific to each particular application  
340 of eDNA.

341

#### 342 *Effect of suspended particulate matter on filtering and detection*

343 As expected, filters with smaller pores filtered less water. A positive relationship  
344 has been demonstrated between sample volume and species detection in both turbid

345 (Williams et al. 2017) and non-turbid water, (Wilcox et al. 2015; Wilcox et al. 2016;  
346 Sepulveda et al. 2019; Bedwell and Goldberg 2020), although under certain conditions  
347 there may not be a relationship between sample volume and species detection (Mächler  
348 et al. 2016). Suspended particulate matter clogs filters and increases filtration pressure,  
349 requiring re-optimization of the capture method (Thomas et al. 2018). Although we did  
350 not measure membrane pressure during our experiment, our data is consistent with  
351 poor eDNA capture due to high membrane pressure. Membrane pressure may  
352 decrease eDNA retention by breaking apart clumps of cells or bursting cells or  
353 mitochondria (Thomas et al. 2018). Glass fiber filters, which performed best in turbid  
354 water, have a completely different pore type and construction than the other filters used  
355 in this study (Table 1).

356 Pore sizes are not necessarily comparable between filter materials. Filter  
357 materials have different pore types. Absolute pores (e.g., polycarbonate and  
358 polyvinylidene fluoride (PVDF)) are uniform in size. These filters act as a screen,  
359 retaining all particles larger than the pores on the filter surface. Glass fiber filters have  
360 nominal pores that are irregular and retain only a percentage of particles larger than the  
361 pore size and are depth filters with multiple layers that trap particles inside a structure.  
362 (Cellulose and cellulose nitrate are other nominal pore filter types that are commonly  
363 used for eDNA capture.) Despite lower capture efficiency, the thickness of depth filters  
364 may provide relatively more space to capture particles in turbid water. Glass fiber filters  
365 are significantly less expensive than the other filters used in this study. However,  
366 PowerWater extractions use a bead beating step that causes glass fiber to become



367 sponge-like, requiring more time and care to separate the supernatant from the beads  
368 and filter.

369         Finally, eDNA interactions with turbidity may vary depending characteristics of  
370 the particulates. In samples from experimental ponds with turbidity up to 60 NTU,  
371 turbidity was positively associated with eDNA detected using 10- $\mu$ m pore polycarbonate  
372 filters and prefiltration, suggesting that eDNA was sticking to larger phytoplankton in the  
373 ponds (Barnes et al. 2020). Turbidity in river-dominated estuaries like the SFE is mainly  
374 caused by river inputs of suspended particulate matter and resuspension of bottom  
375 sediments rather than phytoplankton (Cloern 1987). While eDNA can be detected in  
376 samples of suspended particulate matter collected in sedimentation boxes in rivers  
377 (Díaz et al. 2020), it is not clear if eDNA co-occurs with these particulates or is stuck to  
378 them. In our experiment, turbidity reduced detection rates and we did not see evidence  
379 of eDNA sticking to particulates. Cellular studies suggest that cells may be more likely  
380 to adhere to each other than foreign material (Coman 1961).

381

### 382 *Effect of prefiltration on detection*

383         Prefiltration is sometimes recommended to increase sample volume and  
384 decrease filtration time. Our results indicated a significant interaction between filter type  
385 and prefiltration. One explanation for the negative impact of prefiltration on glass fiber  
386 filters is that prefiltration breaks eDNA particles that cannot be efficiently captured by  
387 glass fiber. For example, clumps of cells may be broken up into individual cells or whole  
388 cells may be reduced to mitochondria. In cases where copy number quantification is  
389 feasible, prefiltration in combination with end filters with small pores may provide more

390 consistent results across turbidity conditions. Prefiltration also increases the cost and  
391 effort in filtering. If the study goal is to determine species presence/absence, and budget  
392 or time is limited, then our results indicate the most practical approach for rare species  
393 detection in turbid conditions is to use glass fiber filters without prefiltration.

394

#### 395 *Future directions*

396 Experimental work is necessarily limited to a relatively narrow range of  
397 treatments but can help tease out the effects of turbidity on eDNA detection without the  
398 complexity of natural systems. eDNA is not homogeneously distributed in natural  
399 environments, making it more difficult to determine if decreased detections in turbid  
400 water reflect real patterns of occurrence or limitations of eDNA detection. eDNA  
401 samples collected in relatively more turbid water (Secchi depth 73 cm; see  
402 Supplemental File S7 for the relationship between Secchi depth and turbidity) can yield  
403 more detections when turbid conditions are more favorable (Kumar et al. 2021).

404 Experimental work encompassing a wide range of turbidity conditions could help further  
405 our understanding of eDNA detection in turbid water. A correction factor could be  
406 developed to account for the decrease in detection observed as turbidity increases,  
407 although such corrections may be particle- or habitat-specific.

408 Finally, turbidity (an optical measurement) is often approximated using other  
409 metrics (e.g., water clarity, total suspended solids, filtration time), severely restricting the  
410 ability to compare eDNA studies conducted in turbid water. Comparable measurements  
411 may help optimize eDNA methods and data interpretation when turbidity is a significant  
412 characteristic of the target species habitat. Optical measurements taken using

413 turbidimeters and probes are the most objective, repeatable, and accurate across a  
414 broad range of values of turbidity and can be used in most water bodies (Pickering  
415 1976). Water clarity measured by Secchi disk is a less expensive alternative but cannot  
416 be used certain conditions (e.g., fast moving water) and is subject to human error  
417 (Carlson and Simpson 1996). Filtration time as a proxy for turbidity is less useful  
418 because it is difficult to calibrate across different studies and filtration set-ups.

419

## 420 **Conclusions**

421 More knowledge of endangered fishes is needed to meet the conservation goals  
422 (Guy et al. 2021), presenting a perfect opportunity to employ high sensitivity methods  
423 like eDNA detection for surveys and monitoring. eDNA detection methods, however, are  
424 not "one size fits all" (Barnes and Turner 2016; Kumar et al. 2021). We use this  
425 comparison of eDNA capture methods under controlled conditions to help guide best  
426 practices for the real-world challenge of detecting a rare species in turbid  
427 conditions. Turbidity and filter type influence eDNA detection success and prefiltration  
428 may not always be beneficial. These findings provide optimism that reliable and  
429 repeatable eDNA detections of rare species are possible in turbid when appropriately  
430 optimized methods are used.

431

## 432 **Data accessibility**

433 Data and R code are available at [https://github.com/annholmes/eDNA-experiments-in-](https://github.com/annholmes/eDNA-experiments-in-turbid-water)  
434 turbid-water.

435

436 **Acknowledgements**

437 Thank you to Grace Auringer, Alyssa Benjamin, Alisha Goodbla, Leslie Guerrero,  
438 and Shannon Kieran for assistance and advice on sampling and laboratory work, to  
439 Dennis Cocherell, Brittany Davis, Luke Ellison, Nann Fanguie, and Tien-Chieh Hung for  
440 access to delta smelt tanks, and to Ted Sommer and Andrea Schreier for feedback and  
441 support. We are grateful to Chris Hart, Jessica Adams, Denise Barnard, Bill Powell, and  
442 the US Fish and Wildlife Service Enhanced Delta Smelt Monitoring (EDSM) Program for  
443 facilitating paired eDNA sampling with trawl surveys. The University of California, Davis  
444 sits on Patwin Land.

445

446 **References**

- 447 Baerwald, M. R., Schumer, G., Schreier, B. M., & May, B. (2011). TaqMan assays for  
448 the genetic identification of delta smelt (*Hypomesus transpacificus*) and Wakasagi  
449 smelt (*Hypomesus nipponensis*). *Molecular Ecology Resources*, 11(5), 784–785.
- 450 Barnes, M. A., & Turner, C. R. (2016). The ecology of environmental DNA and  
451 implications for conservation genetics. *Conservation Genetics*, 17(1), 1–17.  
452 <https://doi.org/10.1007/s10592-015-0775-4>
- 453 Baskerville-Bridges, B., Lindberg, J. C., and Doroshov, S. I. (2004). The effect of light  
454 intensity, alga concentration, and prey density on the feeding behavior of delta  
455 smelt larvae. *American Fisheries Society Symposium*, 39: 219–228
- 456 Bates, D., M. Maechler, B. Bolker, and S. Walker. (2015). Fitting linear mixed-effects  
457 models using lme4. *Journal of Statistical Software* 67:1–48.

- 458 Bedwell, M. E., & Goldberg, C. S. (2020). Spatial and temporal patterns of  
459 environmental DNA detection to inform sampling protocols in lentic and lotic  
460 systems. *Ecology and Evolution*, 00, 1–11. <https://doi.org/10.1002/ece3.6014>
- 461 Bennett, W. A., & Burau, J. R. (2015). Riders on the Storm: Selective Tidal Movements  
462 Facilitate the Spawning Migration of Threatened Delta Smelt in the San Francisco  
463 Estuary. *Estuaries and Coasts*, 38(3), 826–835. [https://doi.org/10.1007/s12237-](https://doi.org/10.1007/s12237-014-9877-3)  
464 014-9877-3
- 465 Budd, A. M., Cooper, M. K., Port, A. Le, Schils, T., Mills, M. S., Deinhart, M. E., ...  
466 Strugnell, J. M. (2021). First detection of critically endangered scalloped  
467 hammerhead sharks (*Sphyrna lewini*) in Guam, Micronesia, in five decades using  
468 environmental DNA. *Ecological Indicators*, 127.  
469 <https://doi.org/10.1016/j.ecolind.2021.107649>
- 470 Bustin, S. A., Benes, V., Garson, J. A., Hellemans, J., Huggett, J., Kubista, M., ...  
471 Wittwer, C. T. (2009). The MIQE Guidelines: Minimum Information for Publication of  
472 Quantitative Real-Time PCR Experiments. *Clinical Chemistry*, 55(4), 611–622.  
473 <https://doi.org/10.1373/clinchem.2008.112797>
- 474 Carlson, R.E. and J. Simpson. 1996. *A Coordinator's Guide to Volunteer Lake*  
475 *Monitoring Methods*. North American Lake Management Society. 96 pp.
- 476 Cloern, J. E. (1987). Turbidity as a control on phytoplankton biomass and productivity in  
477 estuaries. *Continental Shelf Research*, 7(11–12), 1367–1381.  
478 [https://doi.org/10.1016/0278-4343\(87\)90042-2](https://doi.org/10.1016/0278-4343(87)90042-2)

- 479 Collins, R. A., Wangensteen, O. S., O’Gorman, E. J., Mariani, S., Sims, D. W., &  
480 Genner, M. J. (2018). Persistence of environmental DNA in marine systems.  
481 *Communications Biology*, 1(1), 185. <https://doi.org/10.1038/s42003-018-0192-6>
- 482 Coman, D. R. (1961). Adhesiveness and Stickiness: Two Independent Properties of the  
483 Cell Surface. *Cancer Research*, 21(10), 1436–1438.
- 484 Díaz, C., Wege, F. F., Tang, C. Q., Crampton-Platt, A., Rüdell, H., Eilebrecht, E., &  
485 Koschorreck, J. (2020). Aquatic suspended particulate matter as source of eDNA  
486 for fish metabarcoding. *Scientific Reports*, 10(1), 1–8.  
487 <https://doi.org/10.1038/s41598-020-71238-w>
- 488 Day, K., Campbell, H., Fisher, A., Gibb, K., Hill, B., Rose, A., & Jarman, S. N. (2019).  
489 Development and validation of an environmental DNA test for the endangered  
490 Gouldian finch. *Endangered Species Research*, 40, 171–182.  
491 <https://doi.org/10.3354/ESR00987>
- 492 Egeter, B., Peixoto, S., Brito, J. C., Jarman, S., Puppo, P., & Velo-Antón, G. (2018).  
493 Challenges for assessing vertebrate diversity in turbid Saharan water-bodies using  
494 environmental DNA. *Genome*, 61(11), 807–814. [https://doi.org/10.1139/gen-2018-](https://doi.org/10.1139/gen-2018-0071)  
495 0071
- 496 Eichmiller, J. J., Miller, L. M., & Sorensen, P. W. (2015). Optimizing techniques to  
497 capture and extract environmental DNA for detection and quantification of fish.  
498 *Molecular Ecology Resources*, n/a-n/a. <https://doi.org/10.1111/1755-0998.12421>
- 499 Ferrari, M. C. O., Ranåker, L., Weinersmith, K. L., Young, M. J., Sih, A., & Conrad, J. L.  
500 (2014). Effects of turbidity and an invasive waterweed on predation by introduced

501 largemouth bass. *Environmental Biology of Fishes*, 97(1), 79–90.  
502 <https://doi.org/10.1007/s10641-013-0125-7>

503 Feyrer, F., Nobriga, M. L., & Sommer, T. R. (2007). Multidecadal trends for three  
504 declining fish species: habitat patterns and mechanisms in the San Francisco  
505 Estuary, California, USA. *Canadian Journal of Fisheries and Aquatic Sciences*,  
506 64(4), 723–734. <https://doi.org/10.1139/f07-048>

507 Goldberg, C. S., Turner, C. R., Deiner, K., Klymus, K. E., Francis, P., Murphy, M. A., ...  
508 Fremier, A. K. (2016). Critical considerations for the application of environmental  
509 DNA methods to detect aquatic species. *Methods in Ecology and Evolution*, 7,  
510 1299–1307. <https://doi.org/10.1111/2041-210X.12595>

511 Guy, C. S., Cox, T. L., Williams, J. R., Brown, C. D., Eckelbecker, R. W., Glassic, H. C.,  
512 ... Siemiantkowski, M. J. (2021). A paradoxical knowledge gap in science for  
513 critically endangered fishes and game fishes during the sixth mass extinction.  
514 *Scientific Reports*, 11(1), 1–9. <https://doi.org/10.1038/s41598-021-87871-y>

515 Hankins, D. L. (2018). Ecocultural equality in the Miwko? Waali? San Francisco Estuary  
516 and Watershed Science, 16(3), 0–11.  
517 <https://doi.org/10.15447/sfews.2018v16iss3art1>

518 Hasenbein, M., Fangué, N. A., Geist, J., Komoroske, L. M., Truong, J., McPherson, R.,  
519 & Connon, R. E. (2016). Assessments at multiple levels of biological organization  
520 allow for an integrative determination of physiological tolerances to turbidity in an  
521 endangered fish species. *Conservation Physiology*, 4(1), 1–16.  
522 <https://doi.org/10.1093/conphys/cow004>

- 523 Hunter, M. E., Ferrante, J. A., Meigs-Friend, G., & Ulmer, A. (2019). Improving eDNA  
524 yield and inhibitor reduction through increased water volumes and multi-filter  
525 isolation techniques. *Scientific Reports*, 9(1), 1–9. [https://doi.org/10.1038/s41598-](https://doi.org/10.1038/s41598-019-40977-w)  
526 019-40977-w
- 527 Hunter, M. E., Oyler-McCance, S. J., Dorazio, R. M., Fike, J. A., Smith, B. J., Hunter, C.  
528 T., Reed, R. N. & Hart, K. M. (2015). Environmental DNA (eDNA) sampling  
529 improves occurrence and detection estimates of invasive Burmese pythons. *PLoS*  
530 *ONE*, 10(4), 1–17. <https://doi.org/10.1371/journal.pone.0121655>
- 531 Jane, S. F., Wilcox, T. M., Mckelvey, K. S., Young, M. K., Schwartz, K., Lowe, W. H., &  
532 Letcher, B. H. (2015). Distance, flow and PCR inhibition: eDNA dynamics in two  
533 headwater streams. *Molecular Ecology Resources*, 15, 216–227.  
534 <https://doi.org/10.1111/1755-0998.12285>
- 535 Jerde, C. L., Mahon, A. R., Chadderton, W. L., & Lodge, D. M. (2011). “Sight-unseen”  
536 detection of rare aquatic species using environmental DNA. *Conservation Letters*,  
537 4, 150–157. <https://doi.org/10.1111/j.1755-263X.2010.00158.x>
- 538 Klymus, K. E., Merkes, C. M., Allison, M. J., Goldberg, C. S., Helbing, C. C., Hunter, M.  
539 E., ... Richter, C. A. (2019). Reporting the limits of detection and quantification for  
540 environmental DNA assays. *Environmental DNA*, 2(3), 271–282.  
541 <https://doi.org/10.1002/edn3.29>
- 542 Kubista, M. (2014). Prime time for qPCR - Raising the quality bar. *European*  
543 *Pharmaceutical Review*, 19(3), 63–67.



- 544 Kumar, G., Farrell, E., Reaume, A. M., Eble, J. A., & Gaither, M. R. (2021). One size  
545 does not fit all: Tuning eDNA protocols for high- and low-turbidity water sampling.  
546 *Environmental DNA*, (May), 1–14. <https://doi.org/10.1002/edn3.235>
- 547 Laramie, M. B., Pilliod, D. S., Goldberg, C. S., & Strickler, K. M. (2015). Environmental  
548 DNA sampling protocol - filtering water to capture DNA from aquatic organisms.  
549 *U.S Geological Survey Techniques and Methods, Book 2*(Chapter A13), 15 p.  
550 <https://doi.org/10.3133/TM2A13>
- 551 Li, J., Lawson Handley, L.-J., Read, D. S., & Hänfling, B. (2018). The effect of filtration  
552 method on the efficiency of environmental DNA capture and quantification via  
553 metabarcoding. *Molecular Ecology Resources*. [https://doi.org/10.1111/1755-](https://doi.org/10.1111/1755-0998.12899)  
554 [0998.12899](https://doi.org/10.1111/1755-0998.12899)
- 555 Mächler, E., Deiner, K., Spahn, F., & Altermatt, F. (2016). Fishing in the Water: Effect of  
556 Sampled Water Volume on Environmental DNA-Based Detection of  
557 Macroinvertebrates. *Environmental Science and Technology*, *50*(1), 305–312.  
558 <https://doi.org/10.1021/acs.est.5b04188>
- 559 Mahardja, B., Mitchell, L., Beakes, M., Johnston, C., Graham, C., Goertler, P., ...  
560 Matthias, B. (2021). Leveraging Delta Smelt Monitoring for Detecting Juvenile  
561 Chinook Salmon in the San Francisco Estuary. *San Francisco Estuary and*  
562 *Watershed Science*, *19*(1), 1–24. <https://doi.org/10.15447/sfews.2021v19iss1art2>
- 563 Matheson, C. D., Gurney, C., Esau, N., & Lehto, R. (2010). Assessing PCR Inhibition  
564 from Humic Substances. *The Open Enzyme Inhibition Journal*, *3*, 38–45.  
565 <https://doi.org/10.2174/1874940201003010038>

- 566 McCall, M. N., McMurray, H. R., Land, H., & Almudevar, A. (2014). On non-detects in  
567 qPCR data. *Bioinformatics*, 30(16), 2310–2316.  
568 <https://doi.org/10.1093/bioinformatics/btu239>
- 569 Merkes C. M., Klymus K. E., Allison M. J., Goldberg C., Helbing C. C., Hunter M. E.,  
570 Jackson C. A., Lance R. F., Mangan A. M., Monroe E. M., Piaggio A. J., Stokdyk J.  
571 P., Wilson C. C., & Richter C. (2019). Generic qPCR Limit of Detection (LOD) /  
572 Limit of Quantification (LOQ) calculator. R Script. Available at:  
573 [https://github.com/cmerkes/qPCR\\_LOD\\_Calc](https://github.com/cmerkes/qPCR_LOD_Calc). <https://doi.org/10.5066/P9GT00GB>  
574 (Accessed: 2022-07-26).
- 575 Moyle, P. B., Bennett, W. A., Fleenor, W. E., & Lund, J. R. (2010). Habitat Variability  
576 and Complexity in the Upper San Francisco Estuary. *San Francisco Estuary and*  
577 *Watershed Science*, 8(3), 0–24. <https://doi.org/10.15447/sfews.2010v8iss3art1>
- 578 Moyle, P. B., & Bennett, W. A. (2008). The Future of the Delta Ecosystem and Its Fish.  
579 Technical Appendix D. In Lund J, Hanak H, Fleenor W, Bennett, W, Howitt R,  
580 Mount J, Moyle P. Comparing futures for the Sacramento–San Joaquin Delta.  
581 *Public Policy Institute of California*, 46.
- 582 Moyle, P., Brown, L., Durand, J., & Hobbs, J. (2016). Delta Smelt: Life History and  
583 Decline of a Once-Abundant Species in the San Francisco Estuary. *San Francisco*  
584 *Estuary and Watershed Science*, 14(2).  
585 <https://doi.org/10.15447/sfews.2016v14iss2art6>
- 586 Moyle, P. B., Herbold, B., Stevens, D. E., & Miller, L. W. (1992). Life History and Status  
587 of Delta Smelt in the Sacramento-San Joaquin Estuary, California. *Transactions of*

588 *the American Fisheries Society*, 121(1), 67–77. <https://doi.org/10.1577/1548->  
589 8659(1992)121<0067:LHASOD>2.3.CO;2

590 Moyle, P. B., Hobbs, J. A., & Durand, J. R. (2018). Delta Smelt and Water Politics in  
591 California. *Fisheries*, 43(1), 42–51. <https://doi.org/10.1002/fsh.10014>

592 Nobriga, M., Feyrer, F., Baxter, R. D., & Chotkowski, M. (2005). Fish Community  
593 Ecology in an Altered River Delta: Spatial Patterns in Species Composition, Life  
594 History Strategies, and Biomass. *Estuaries*, 28(5), 776–785.

595 Nobriga, M. L. (2002). Larval Delta smelt diet composition and feeding incidence:  
596 Environmental and ontogenetic influences. *California Fish and Game*, 88(4), 149–  
597 164.

598 Pinheiro, J., Bates, D., DebRoy, S., Sarkar, D., and the R Development Core Team  
599 (2013). nlme: Linear and Nonlinear Mixed Effects Models. R package version 3.1-  
600 108. <https://cran.r-project.org/web/packages/nlme/index.html>

601 Pickering, R. (1976). *Measurement of “turbidity” and related characteristics of natural*  
602 *waters*.

603 Renan, S., Gafny, S., Perl, R. G. B., Roll, U., Malka, Y., Vences, M., & Geffen, E.  
604 (2017). Living quarters of a living fossil — Uncovering the current distribution  
605 pattern of the rediscovered Hula painted frog (*Latonia nigriventer*) using  
606 environmental DNA. *Molecular Ecology*, 26, 6801–6812.  
607 <https://doi.org/10.1111/mec.14420>

608 Robson, H. L. A., Noble, T. H., Saunders, R. J., Robson, S. K. A., Burrows, D. W., &  
609 Jerry, D. R. (2016). Fine-tuning for the tropics: application of eDNA technology for

610 invasive fish detection in tropical freshwater ecosystems. *Molecular Ecology*  
611 *Resources*, 16(4), 922–932. <https://doi.org/10.1111/1755-0998.12505>

612 Sassoubre, L. M., Yamahara, K. M., Gardner, L. D., Block, B. A., & Boehm, A. B.  
613 (2016). Quantification of environmental DNA (eDNA) shedding and decay rates for  
614 three marine fish. *Environmental Science and Technology*, 50, 10456–10464.  
615 <https://doi.org/10.1021/acs.est.6b03114>

616 Schabacker, J. C., Amish, S. J., Ellis, B. K., Gardner, B., Miller, D. L., Rutledge, E. A.,  
617 Sepulveda, A. J. & Luikart, G. (2020). Increased eDNA detection sensitivity using a  
618 novel high-volume water sampling method. *Environmental DNA*, 2, 244-251.  
619 <https://doi.org/10.1002/edn3.63>

620 Schultz, M. T., & Lance, R. F. (2015). Modeling the sensitivity of field surveys for  
621 detection of environmental DNA (eDNA). *PLoS ONE*, 10(10), 1–16.  
622 <https://doi.org/10.1371/journal.pone.0141503>

623 Schoellhamer, D. H. (2002). Variability of suspended-sediment concentration at tidal to  
624 annual time scales in San Francisco Bay, USA. *Continental Shelf Research*,  
625 22(11–13), 1857–1866. [https://doi.org/10.1016/S0278-4343\(02\)00042-0](https://doi.org/10.1016/S0278-4343(02)00042-0)

626 Sepulveda, A. J., Schabacker, J., Smith, S., Al-Chokhachy, R., Luikart, G., & Amish, S.  
627 J. (2019). Improved detection of rare, endangered and invasive trout in using a new  
628 large-volume sampling method for eDNA capture. *Environmental DNA*, 1(3), 227–  
629 237. <https://doi.org/10.1002/edn3.23>

630 Seymour, M., Durance, I., Cosby, B. J., Ransom-Jones, E., Deiner, K., Ormerod, S. J.,  
631 ... Creer, S. (2018). Acidity promotes degradation of multi-species environmental

- 632 DNA in lotic mesocosms. *Communications Biology*, 1(1), 4.  
633 <https://doi.org/10.1038/s42003-017-0005-3>
- 634 Shaw, J. L. A., Clarke, L. J., Wedderburn, S. D., Barnes, T. C., Weyrich, L. S., &  
635 Cooper, A. (2016). Comparison of environmental DNA metabarcoding and  
636 conventional fish survey methods in a river system. *Biological Conservation*, 197,  
637 131–138. <https://doi.org/10.1016/j.biocon.2016.03.010>
- 638 Shogren, A. J., Tank, J. L., Egan, S. P., August, O., Rosi, E. J., Hanrahan, B. R., ...  
639 Bolster, D. (2018). Water Flow and Biofilm Cover Influence Environmental DNA  
640 Detection in Recirculating Streams. *Environmental Science and Technology*,  
641 52(15), 8530–8537. <https://doi.org/10.1021/acs.est.8b01822>
- 642 Sigsgaard, E. E., Nielsen, I. B., Carl, H., Krag, M. A., Knudsen, S. W., Xing, Y., ...  
643 Thomsen, P. F. (2017). Seawater environmental DNA reflects seasonality of a  
644 coastal fish community. *Marine Biology*, 164(6), 1–15.  
645 <https://doi.org/10.1007/s00227-017-3147-4>
- 646 Sommer, T., Armor, C., Baxter, R., Breuer, R., Brown, L., Chotkowski, M., ... Souza, K.  
647 (2007). The collapse of pelagic fishes in the upper San Francisco estuary.  
648 *Fisheries*, 32(6), 270–277.
- 649 Sommer, T., Mejia, F., Nobriga, M., Feyrer, F., & Grimaldo, L. (2011). The spawning  
650 migration of delta smelt in the Upper San Francisco Estuary. *San Francisco*  
651 *Estuary & Watershed Science*, 9(2), 1–16.  
652 <https://doi.org/10.5811/westjem.2011.5.6700>

- 653 Strickler, K. M., Fremier, A., & Goldberg, C. S. (2015). Quantifying effects of UV-B,  
654 temperature, and pH on eDNA degradation in aquatic microcosms. *Biological*  
655 *Conservation*, 183, 85–92.
- 656 Stoeckle, M. Y., Adolf, J., Ausubel, J. H., Charlop-Powers, Z., Dunton, K. J., & Hinks, G.  
657 (2022). Current laboratory protocols for detecting fish species with environmental  
658 DNA optimize sensitivity and reproducibility, especially for more abundant  
659 populations. *ICES Journal of Marine Science*.  
660 <https://doi.org/10.1093/icesjms/fsab273>
- 661 Takahara, T., Minamoto, T., Yamanaka, H., Doi, H., & Kawabata, Z. (2012). Estimation  
662 of fish biomass using environmental DNA. *PLoS ONE*, 7(4), e35868.  
663 <https://doi.org/10.1371/journal.pone.0035868>
- 664 Thomas, A. C., Howard, J., Nguyen, P. L., Seimon, T. A., & Goldberg, C. S. (2018).  
665 eDNA Sampler: A fully integrated environmental DNA sampling system. *Methods in*  
666 *Ecology and Evolution*, 9, 1379–1385. <https://doi.org/10.1111/2041-210X.12994>
- 667 Tigan, G., Mulvaney, W., Ellison, L., Schultz, A., & Hung, T. C. (2020). Effects of light  
668 and turbidity on feeding, growth, and survival of larval Delta Smelt (*Hypomesus*  
669 *transpacificus*, Actinopterygii, Osmeridae). *Hydrobiologia*, 847(13), 2883–2894.  
670 <https://doi.org/10.1007/s10750-020-04280-4>
- 671 Tsuji, S., Takahara, T., Doi, H., Shibata, N., & Yamanaka, H. (2019). The detection of  
672 aquatic macroorganisms using environmental DNA analysis-A review of methods  
673 for collection, extraction, and detection. *Environmental DNA*, (April), 1–10.  
674 <https://doi.org/10.1002/edn3.21>

- 675 Turner, C. R., Barnes, M. A., Xu, C. C. Y., Jones, S. E., Jerde, C. L., & Lodge, D. M.  
676 (2014). Particle size distribution and optimal capture of aqueous microbial eDNA.  
677 *Methods in Ecology and Evolution*, 5(7), 676–684. <https://doi.org/10.1111/2041->  
678 210X.12206
- 679 USFWS (United States Fish and Wildlife Service). (1993). Determination of threatened  
680 status for the delta smelt. *Federal Register* 58:12854-12864.
- 681 USFWS (United States Fish and Wildlife Service), Senegal, T., Mckenzie, R., Speegle,  
682 J., Perales, B., Bridgman, D., Erly, K., Staiger, S., Arrambide, A., and Gilbert, M.  
683 (2022). Interagency Ecological Program and US Fish and Wildlife Service: San  
684 Francisco Estuary Enhanced Delta Smelt Monitoring Program data, 2016-2021 ver  
685 8. Environmental Data Initiative.  
686 <https://doi.org/10.6073/pasta/e1a540c161b7be56b941df50fd7b44c5> (Accessed  
687 2022-07-26).
- 688 Wilcox, T. M., McKelvey, K. S., Young, M. K., Lowe, W. H., & Schwartz, M. K. (2015).  
689 Environmental DNA particle size distribution from Brook Trout (*Salvelinus*  
690 *fontinalis*). *Conservation Genetics Resources*, 7(3), 639–641.  
691 <https://doi.org/10.1007/s12686-015-0465-z>
- 692 Williams, K. E., Huyvaert, K. P., & Piaggio, A. J. (2017). Clearing muddied waters:  
693 Capture of environmental DNA from turbid waters. *PLoS ONE*, 12(7), 1–17.  
694 <https://doi.org/10.1371/journal.pone.0179282>
- 695
- 696 **Author contributions**
- 697 Conception and design: AH, MB, JR, BS, AF

698 Experiments and laboratory work: AH

699 Field sampling: AH, BM

700 Data analysis: AH with input from BM

701 Prepared first draft of manuscript: AH

702 Revised and approved: AH, MB, JR, BS, BM, AF

703

## 704 **Table and Figure Legends**

705

706 **Table 1.** Characteristics of the filters and prefilter used in the filtration experiment.

707

708 **Table 2.** Reagent volumes (a) and qPCR thermocycling protocol (b) for delta smelt

709 eDNA detection.

710

711 **Table 3.** Summary of detection rate and DNA copies detected for each treatment in the

712 filtration experiment (turbidity, prefilter, and amount of tank water added (mL)). Further

713 details in

714 Supplementary Data S5. GF, glass fiber filter; PC, polycarbonate filter; ST, Sterivex

715 PVDF filter.

716

717 **Table 4.** Summary of best models for success of delta smelt eDNA detection using (a)

718 eDNA copies and (b) detection/non-detection as the response variables. Results of all

719 models tested are provided Tables S6 and S7.

720



721 **Figure 1.** Upper San Francisco Estuary (California, USA) collection sites (inset) for  
722 water used in filtration experiments. Non-turbid water (~5 NTU) was collected from the  
723 upper Sacramento Deep Water Shipping Channel (38.5653, -121.5539) and turbid  
724 water (~50 NTU) was collected from upper Prospect Slough (35.5299, -121.589),  
725 adjacent to the shipping channel. (Map made using kepler.gl and mapbox.)

726

727 **Figure 2.** Schematic representation of filtration experiment. Three biological replicates  
728 of 6 treatments were each filtered on 4 different filter types and assessed in 6 qPCR  
729 replicates using a species-specific assay (Baerwald et al. 2011). GF, glass fiber filter;  
730 PC, polycarbonate filter; ST, Sterivex cartridge filter.

731

732 **Figure 3.** Calibration curve showing Limit of Detection (LOD) for one replicate (2.47  
733 copies) and the Limit of Quantification (LOQ; 67 copies) for the delta smelt Taqman  
734 assay (Baerwald et al. 2011). Calculations follow standard methods for validating eDNA  
735 assays (Klymus et al. 2019; Merkes et al. 2019). Only points in the middle 2 quartiles of  
736 standards with at least 50% detection (black circles) are included in the calculations.

737

738 **Figure 4.** Results of filtration experiments as detection/non-detection of qPCR  
739 replicates (n=6) within 1-L biological replicates (n=3) for each treatment. Rows are  
740 treatment (turbidity and prefiltration), columns are filter type, and amount of delta smelt  
741 tank water added is within each box. GF, glass fiber filter; PC, polycarbonate filter; ST,  
742 Sterivex cartridge filter.

743

744 **Figure 5.** Results of filtration experiments as eDNA copies in qPCR replicates (n=6)  
 745 within 1-L biological replicates (n=3) for each treatment. Rows are treatment (turbidity  
 746 and prefiltration), columns are filter type, and amount of delta smelt tank water added is  
 747 within each box. The black dotted line is the Limit of Quantification (LOQ) and the red  
 748 dashed line is the Limit of Detection (LOD). GF, glass fiber filter; PC, polycarbonate  
 749 filter; ST, Sterivex cartridge filter.

750

751

752

753

754

755

756

757

| Filters                                                 | Abbreviation | Filter shape  | Filter type | Pore size | Pore type |
|---------------------------------------------------------|--------------|---------------|-------------|-----------|-----------|
| Sterivex polyvinylidene fluoride (PVDF; MilliporeSigma) | ST           | cartridge     | screen      | 0.45 µm   | absolute  |
| Glass fiber (Whatman)                                   | GF           | 47mm diameter | depth       | 1.6 µm    | nominal   |
| Polycarbonate track-etched (MilliporeSigma)             | PC           | 47mm diameter | screen      | 5 µm      | absolute  |
| Polycarbonate track-etched (MilliporeSigma)             | PC           | 47mm diameter | screen      | 10 µm     | absolute  |
| <b>Prefilter</b>                                        |              |               |             |           |           |
| Nylon net (MilliporeSigma)                              | NN           | 47mm diameter | screen      | 20 µm     | mesh      |

758

759

760  
761  
762  
763  
764  
765  
766  
767  
768  
769  
770  
771  
772  
773

| Reagent                                                  | Volume                      |
|----------------------------------------------------------|-----------------------------|
| Taqman Environmental Master Mix 2.0 (Applied Biosystems) | 10 $\mu$ l                  |
| Primer CytB-Htr-F (10 $\mu$ M)                           | 1.8 $\mu$ l                 |
| Primer CytB-Htr-R (10 $\mu$ M)                           | 1.8 $\mu$ l                 |
| Probe CytB-Htr-P                                         | 0.3 $\mu$ l                 |
| DNA template                                             | 6.1 $\mu$ l                 |
| <b>Total</b>                                             | <b>20 <math>\mu</math>l</b> |

774  
775

| Step                 | Time   | Temperature | Cycles |
|----------------------|--------|-------------|--------|
| Initial denaturation | 10 min | 95°C        | 1      |
| Denaturation         | 15 sec | 95°C        | 50     |
| Annealing/Extension  | 1 min  | 63°C        |        |

776  
777

778

779

780

781

782

783

784

785

786

787

788

789

790

791

| Treatment                       | Detection | DNA copies per reaction (6.1 µl template) |        |       |       |       | Approximate volume filtered (mL) | Mean DNA copies adjusted for volume filtered |
|---------------------------------|-----------|-------------------------------------------|--------|-------|-------|-------|----------------------------------|----------------------------------------------|
|                                 |           | Mean                                      | Median | SD    | Min   | Max   |                                  |                                              |
| <i>Non-turbid</i>               |           |                                           |        |       |       |       |                                  |                                              |
| GF+500                          | 18/18     | 233.4                                     | 203.7  | 94.3  | 141   | 489.8 | 1000                             | 233.4                                        |
| PC10+500                        | 16/18     | 24.2                                      | 11.4   | 22.8  | 0     | 63.8  | 1000                             | 24.2                                         |
| PC5+500                         | 18/18     | 68.6                                      | 60.3   | 46.1  | 9.6   | 161.4 | 1000                             | 68.6                                         |
| ST+500                          | 18/18     | 106.6                                     | 92.7   | 98.9  | 26.8  | 476.8 | 500                              | 213.2                                        |
| GF+1000                         | 18/18     | 324.7                                     | 310.1  | 111.9 | 128.4 | 560.4 | 1000                             | 324.7                                        |
| PC10+1000                       | 17/18     | 53.3                                      | 48.3   | 34.9  | 0     | 135.5 | 1000                             | 53.3                                         |
| PC5+1000                        | 18/18     | 106.4                                     | 103.5  | 40.4  | 58.8  | 187.1 | 1000                             | 106.4                                        |
| ST+1000                         | 18/18     | 238.1                                     | 173.3  | 157.2 | 73.4  | 506.6 | 500                              | 476.2                                        |
| <i>Turbid without prefilter</i> |           |                                           |        |       |       |       |                                  |                                              |
| GF+500                          | 18/18     | 30.8                                      | 34.7   | 15.8  | 5.9   | 55    | 1000                             | 30.8                                         |
| PC10+500                        | 8/18      | 3.3                                       | 0      | 4.7   | 0     | 15.7  | 450                              | 7.3                                          |
| PC5+500                         | 10/18     | 5.8                                       | 3.9    | 6.6   | 0     | 20.2  | 200                              | 29                                           |
| ST+500                          | 11/18     | 8.3                                       | 5      | 9.5   | 0     | 31    | 100                              | 83                                           |
| GF+1000                         | 17/18     | 46.9                                      | 47.4   | 33.7  | 0     | 99.4  | 1000                             | 46.9                                         |
| PC10+1000                       | 9/18      | 7.1                                       | 2.5    | 11.3  | 0     | 45.5  | 450                              | 15.8                                         |
| PC5+1000                        | 5/18      | 5.5                                       | 0      | 10    | 0     | 31.5  | 200                              | 27.5                                         |
| ST+1000                         | 12/18     | 8.4                                       | 6.5    | 8.3   | 0     | 22.5  | 100                              | 84                                           |
| <i>Turbid with prefilter</i>    |           |                                           |        |       |       |       |                                  |                                              |
| GF+500                          | 9/18      | 23.2                                      | 3.3    | 34.9  | 0     | 94.2  | 1000                             | 23.2                                         |
| PC10+500                        | 17/18     | 49.3                                      | 49     | 27.2  | 0     | 96.5  | 750                              | 65.7                                         |
| PC5+500                         | 17/18     | 31.7                                      | 36.8   | 23.5  | 0     | 76.5  | 200                              | 158.5                                        |
| ST+500                          | 17/18     | 21.9                                      | 20.4   | 12.5  | 0     | 41.4  | 150                              | 146                                          |
| GF+1000                         | 9/18      | 29.3                                      | 19.9   | 33    | 0     | 98.7  | 1000                             | 29.3                                         |
| PC10+1000                       | 17/18     | 38.8                                      | 29.1   | 25.7  | 8.3   | 80.1  | 750                              | 51.7                                         |
| PC5+1000                        | 17/18     | 99.4                                      | 64.2   | 89.6  | 4.6   | 269.1 | 200                              | 497                                          |
| ST+1000                         | 17/18     | 44.7                                      | 46.8   | 22.2  | 8.4   | 80.7  | 150                              | 298                                          |

792

793

794

795

796

797

798

799

800

801

| <b>Fixed effects model structure for Log(eDNA Copies + 1)</b>                                    | <b>ΔAICc</b> | <b>W<sub>i</sub></b> | <b>Cumulative W<sub>i</sub></b> |
|--------------------------------------------------------------------------------------------------|--------------|----------------------|---------------------------------|
| Turbidity + Filter + Prefilter + Volume + Tank water added + Filter*Turbidity + Filter*Prefilter | 0            | 0.4974               | 0.4974                          |
| Turbidity + Filter + Prefilter + Tank water added + Filter*Turbidity + Filter*Prefilter          | 0            | 0.4974               | 0.9948                          |
| <b>Fixed effects model structure for Detection/Non-detection</b>                                 |              |                      |                                 |
| Turbidity + Filter + Prefilter + Volume + Filter*Prefilter                                       | 0            | 0.381                | 0.381                           |
| Filter + Prefilter + Volume + Tank water added + Filter*Prefilter                                | 0.1          | 0.356                | 0.737                           |
| Turbidity + Filter + Prefilter + Volume + Tank water added + Filter*Prefilter                    | 1.7          | 0.16                 | 0.897                           |
| Turbidity + Filter + Prefilter + Volume + Filter*Prefilter + Filter*Turbidity                    | 3.8          | 0.056                | 0.953                           |
| Turbidity + Filter + Prefilter + Volume + Tank water added + Filter*Prefilter + Filter*Turbidity | 5.6          | 0.023                | 0.976                           |
| Turbidity + Filter + Prefilter + Tank water added + Filter*Prefilter + Filter*Turbidity          | 5.6          | 0.023                | 0.999                           |

802

803

804

805

806

807

808

809

810

811

812

813

814

815

816

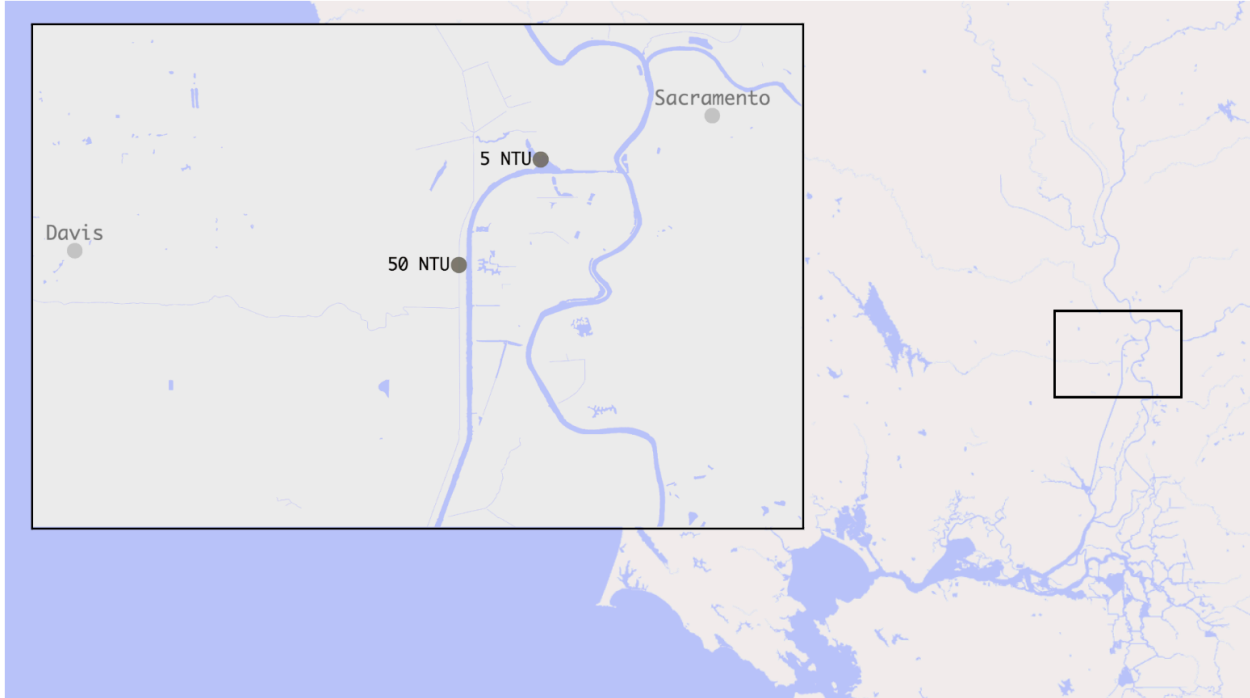

817

818

819

820

821

822

823

824

825

826

827

828

829

830

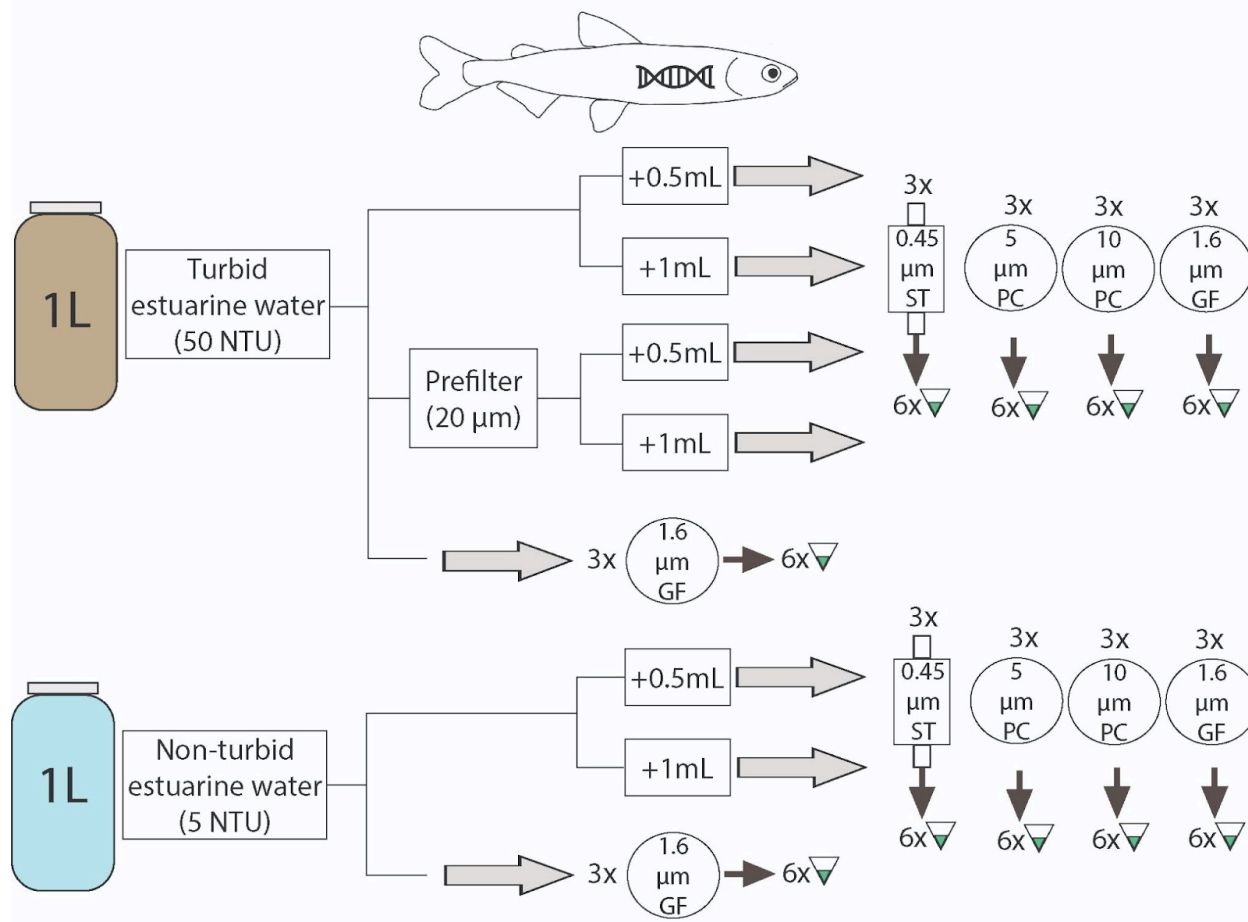

831

832

833

834

835

836

837

838

839

840



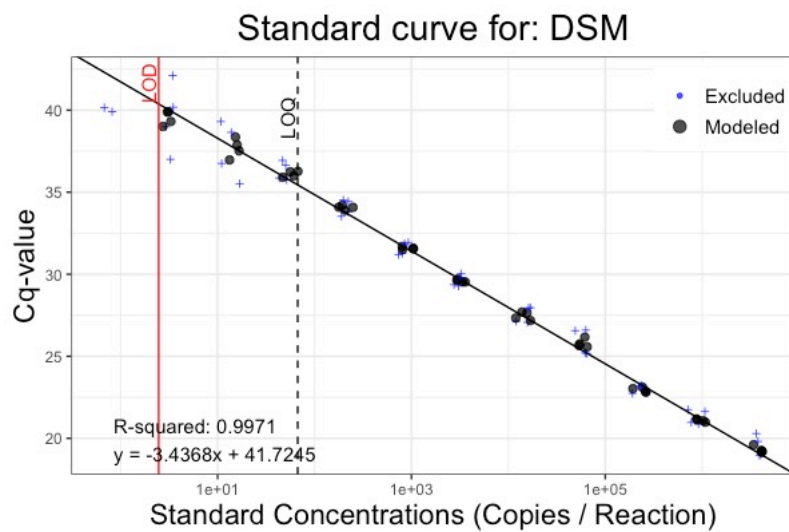

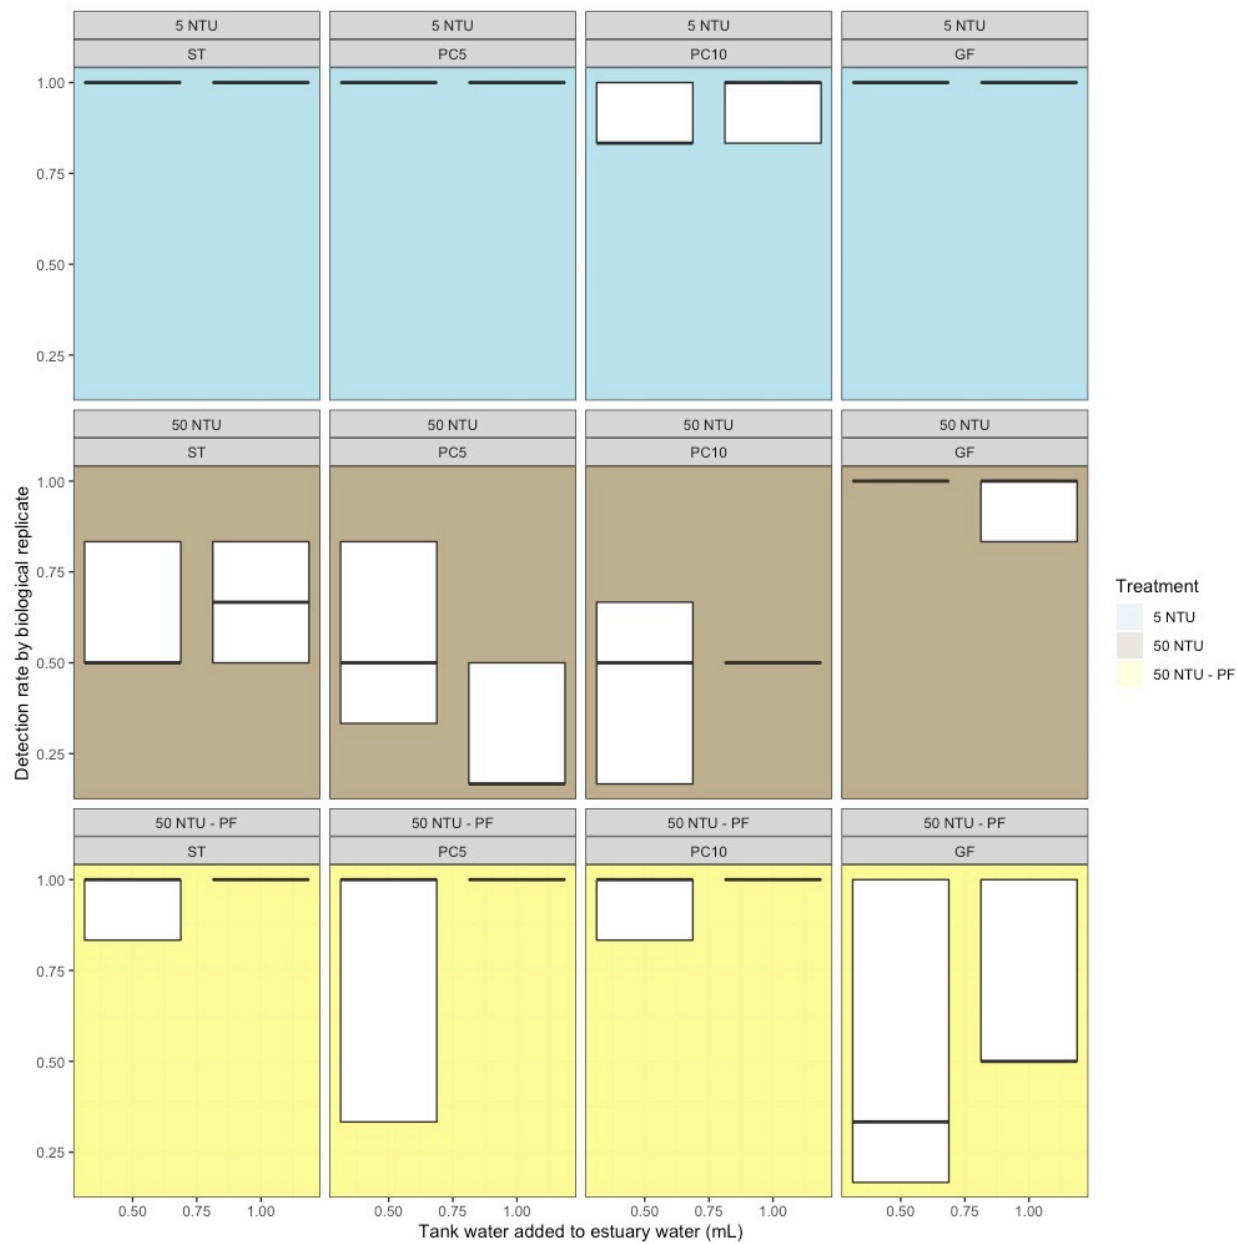

858

859

860

861

862

863

864

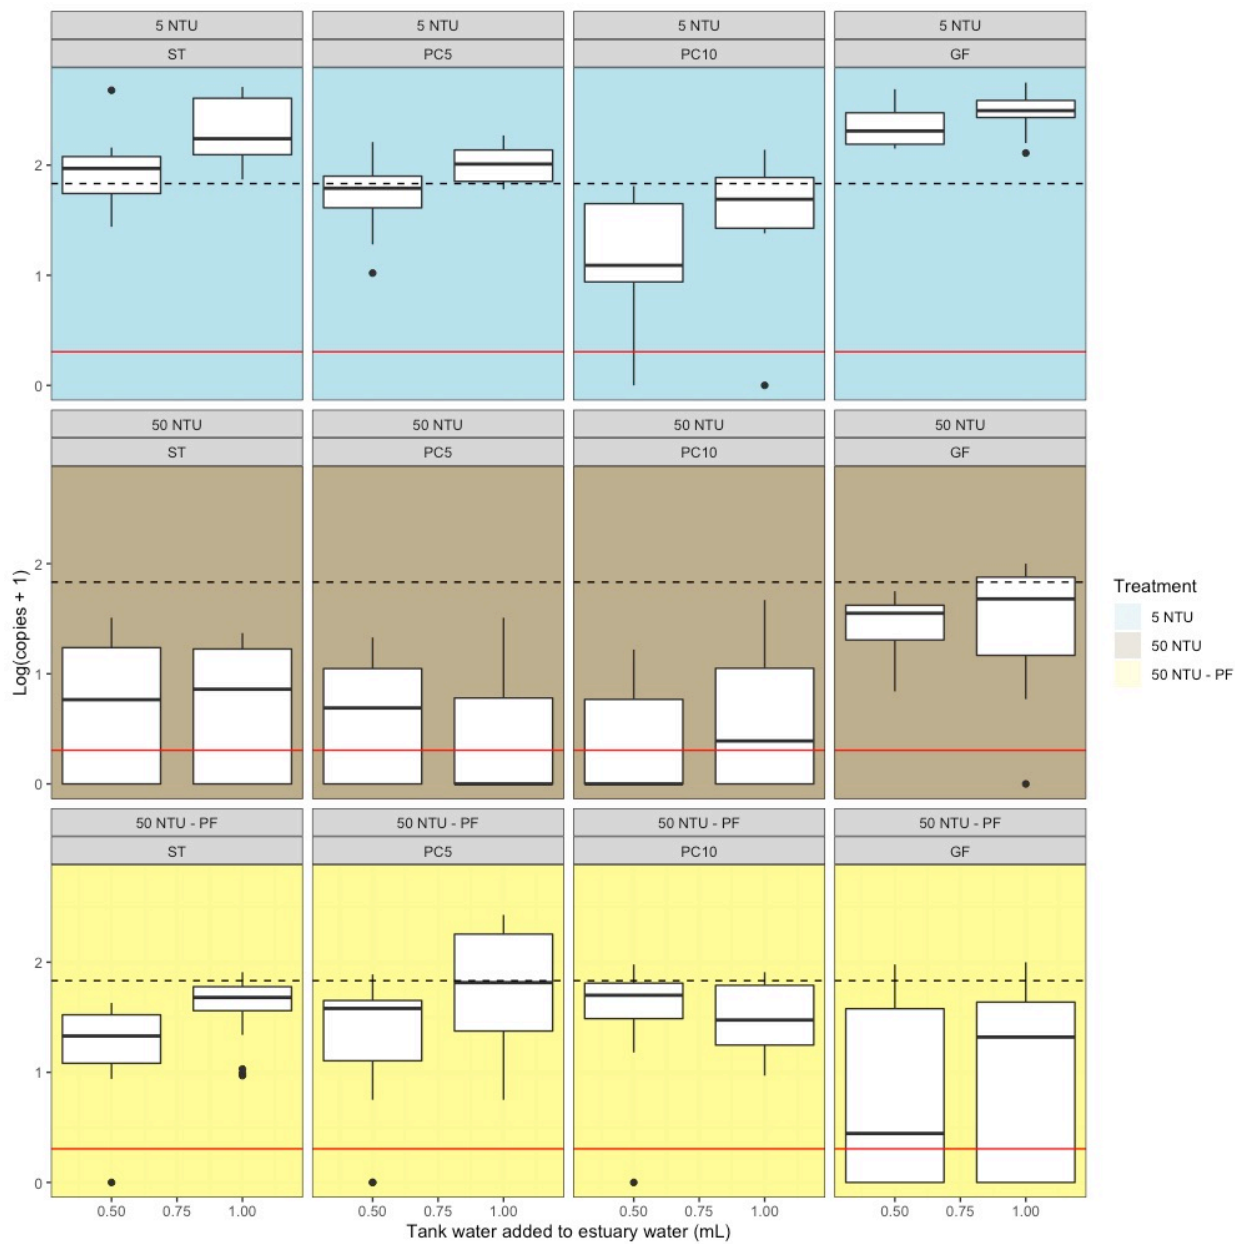

865
